# Supplementary material for: Suppression of the phytoene synthase gene (EgcrtB) alters carotenoid content and intracellular structure of Euglena gracilis
Source: PubMed Central journal article supplement (PMC5513367; doi:10.1186/s12870-017-1066-7), 2017-07-17
Supplement: 12870_2017_1066_MOESM1_ESM.pdf [file 12870_2017_1066_MOESM1_ESM.pdf]

**A** 27  $\mu\text{mol m}^{-2} \text{s}^{-1}$ 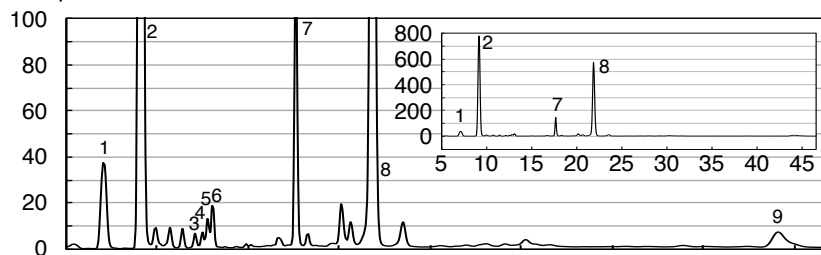**B** 55  $\mu\text{mol m}^{-2} \text{s}^{-1}$ 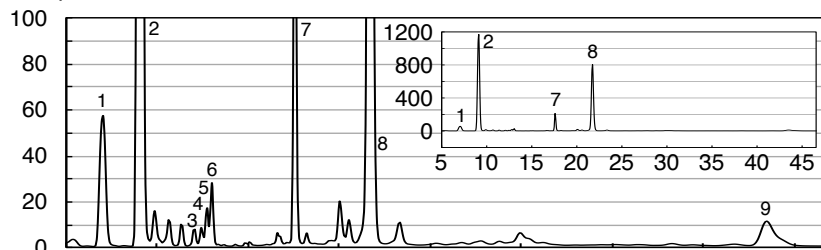**C** 240  $\mu\text{mol m}^{-2} \text{s}^{-1}$ 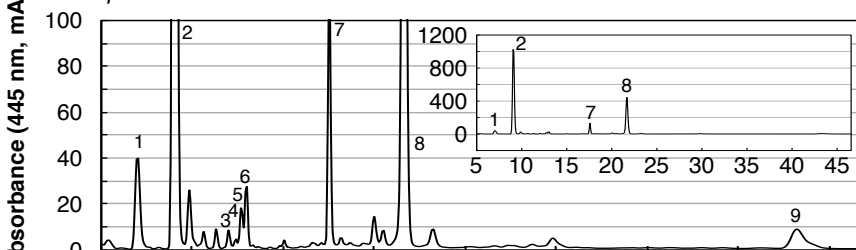**D** 460  $\mu\text{mol m}^{-2} \text{s}^{-1}$ 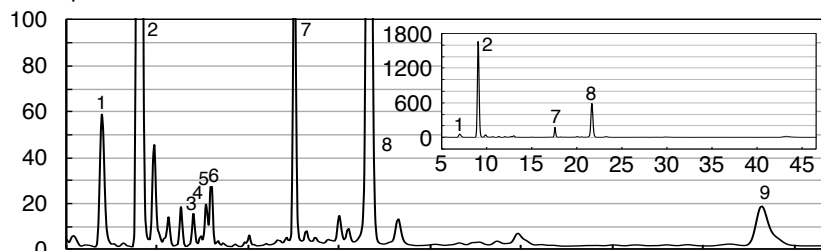**E** 920  $\mu\text{mol m}^{-2} \text{s}^{-1}$ 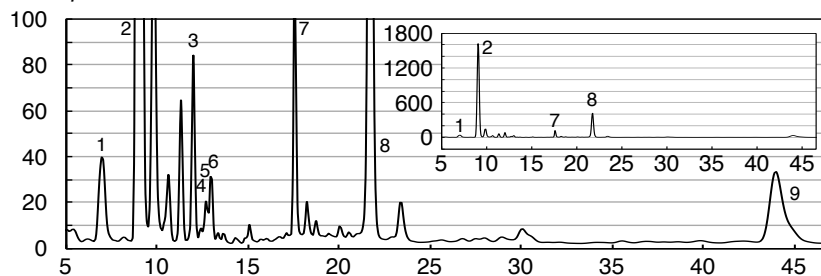

Retention time (min)
