# Supplementary material for: Suppression of the phytoene synthase gene (EgcrtB) alters carotenoid content and intracellular structure of Euglena gracilis
Source: PubMed Central journal article supplement (PMC5513367; doi:10.1186/s12870-017-1066-7), 2017-07-17

**A non-electroporated**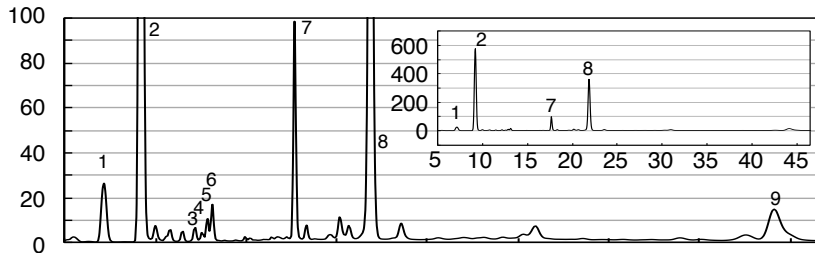**B *EgcrT*-dsRNA (-)**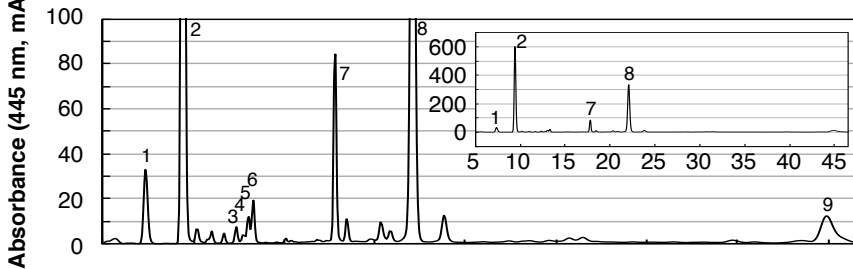**C *EgcrT*-dsRNA (+)**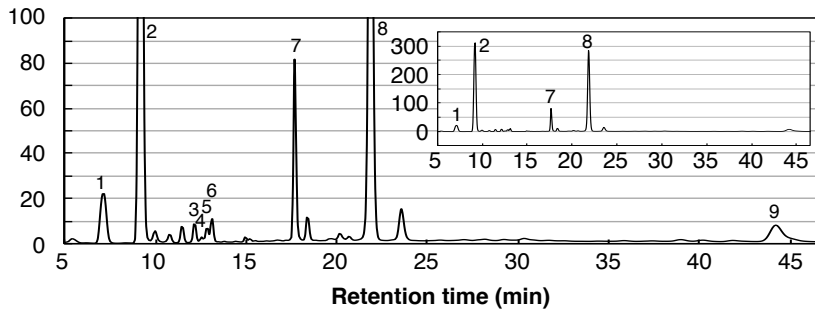

Supplement: 12870_2017_1066_MOESM2_ESM.pdf [file 12870_2017_1066_MOESM2_ESM.pdf]
